# Supplementary material for: Preventive effect of dietary astaxanthin on UVA-induced skin photoaging in hairless mice
Source: PLoS One. 2017 Feb 7;12(2):e0171178. doi: 10.1371/journal.pone.0171178 (PMC5295690; doi:10.1371/journal.pone.0171178)
Supplement: S1 Table — (XLSX) [file pone.0171178.s001.xlsx]

## Sheet: Sheet1
	Gene name	Forward (from 5' to 3')	Reverse (from 5' to 3')
	LEKTI	ACGGTGCCAATGCTTCTGA	AATTGTTGCCTTTGGGACACG
	STS	GGGGACAGGGTGATTGACG	GCGTTGCAGTAGTGGAACAG
	AQP3	ATCAAGCTGCCCATCTATGC	GCCAGAGACGAAAAGCTCAT
	TGM2	GACAATGTGGAGGAGGGATCT	CTCTAGGCTGAGACGGTACAG
	MMP13	CTTTGGCTTAGAGGTGACTGG	AGGCACTCCACATCTTGGTTT
	POMC	CCGGAAGTACGTCATGGGTC	CCGACTCGTTCTCAGCAAC
